# Supplementary material for: Down-Regulation of Lipid Metabolism in the Hepatopancreas of Shrimp Litopenaeus vannamei upon Light and Heavy Infection of Enterocytozoon hepatopenaei: A Comparative Proteomic Study
Source: MDPI journal article supplement (doi:10.3390/ijms231911574), 2022-09-30
Supplement: s1 [file s1]

**Table S1 Representative proteins of challenged hepatopancreas response to EHP infection.**

| Protein description                   | Accession  | Coverage (%) | Regulation | Fold change |      |
|---------------------------------------|------------|--------------|------------|-------------|------|
|                                       |            |              |            | L           | H    |
| Immunity related proteins             |            |              |            |             |      |
| Alpha-2-macroglobulin                 | A0A3R7PBU1 | 27.4         | ↑          | 2.9         | 2.6  |
| Alpha-2-macroglobulin                 | A0A3R7LW48 | 20.7         | ↑          | 2.7         | 2.7  |
| Alpha 2 macroglobulin                 | A3QX15     | 31.8         | ↑          | 8.5         | 19.0 |
| Alpha2 macroglobulin isoform 2        | A0A3R7MMK2 | 41.5         | ↑          | 2.5         | 2.5  |
| C-type lectin                         | A0A3R7P632 | 43.4         | ↑          | 5.6         | 5.7  |
| C-type lectin 2                       | A0A3R7QZ52 | 36.2         | ↑          | 2.5         | 3.0  |
| C-type lectin 4                       | A0A3R7SQW2 | 25.2         | ↓          | —           | 0.4  |
| C-type lectin 4                       | A0A0E3M3P5 | 41           | ↓          | 0.5         | 0.3  |
| C-type lectin 2                       | A0A3R7M7I2 | 52           | ↓          | 0.5         | 0.3  |
| Lectin A isoform 1                    | A0A3R7M3U8 | 21.1         | ↓          | 0.06        | 0.03 |
| Lectin 3                              | A0A3R7MTG0 | 35           | ↑          | 2.4         | —    |
| C-type lectin                         | B2KNK9     | 40.4         | ↑          | 2.5         | —    |
| C-type lectin                         | A0A3R7SPY9 | 53.4         | ↑          | 2.3         | —    |
| C-type lectin 1                       | A0A3R7NP07 | 20.1         | ↑          | 2.4         | —    |
| Hemocyanin                            | A0A3R7PEN2 | 53.5         | ↑          | 2.0         | 2.0  |
| Hemocyanin subunit L2                 | A0A3R7NPL9 | 22.1         | ↑          | 1.9         | 2.0  |
| Hemocyanin                            | A0A088MK65 | 53.3         | ↑          | 1.6         | —    |
| Putative antimicrobial peptide        | Q8WRP3     | 35.8         | ↑          | —           | 2.6  |
| Antiviral protein                     | L7UV69     | 54           | ↑          | 1.7         | —    |
| Lysozyme                              | Q95V66     | 47.5         | ↑          | 24.8        | 30.4 |
| Putative ferritin light-chain subunit | A0A3R7PE83 | 35           | ↓          | —           | 0.5  |
| Putative ferritin light-chain subunit | A0A3R7MQT1 | 32.6         | ↓          | —           | 0.5  |
| Ferritin                              | Q58FL0     | 49.4         | ↓          | 0.3         | 0.2  |

|                                                         |            |      |   |     |      |
|---------------------------------------------------------|------------|------|---|-----|------|
| Ferritin 2                                              | A0A3R7MIG4 | 17.4 | ↓ | —   | 0.5  |
| Peritrophin-44-like protein                             | A0A3R7Q1E9 | 18.8 | ↓ | —   | 0.3  |
| Prophenoloxidase activating factor                      | A0A3R7PF55 | 23.4 | ↑ | 2.5 | 5.0  |
| Prophenoloxidase-2                                      | B0LUE5     | 49.3 | ↑ | 4.0 | 8.7  |
| Cathepsin B                                             | D8X153     | 41.1 | ↑ | —   | 1.9  |
| Cathepsin C                                             | A0A3R7PQ19 | 34.7 | ↓ | —   | 0.50 |
| Cathepsin 1 (Fragment)                                  | Q27760     | 49.7 | ↓ | 0.4 | 0.3  |
| Cathepsin 1                                             | Q27759     | 54.9 | ↓ | 0.4 | 0.3  |
| Putative serine proteinase inhibitor                    | A0A3R7QNE7 | 28.7 | ↑ | 3.0 | 3.1  |
| Pacifastin light chain-like serine proteinase inhibitor | A0A0K2CT08 | 49.5 | ↑ | 4.0 | 4.3  |
| Caspase 3                                               | R4PV13     | 48.4 | ↑ | 3.9 | 4.1  |
| Caspase 1                                               | A0A3R7LSW4 | 43.3 | ↓ | —   | 0.5  |
| <b>Energy generation and conversion</b>                 |            |      |   |     |      |
| Putative glycerol-3-phosphate dehydrogenase             | A0A3R7PAZ3 | 72.3 | ↓ | 0.6 | 0.5  |
| L-lactate dehydrogenase                                 | I1SSL2     | 45.8 | ↑ | 2.8 | 4.6  |
| Pyruvate carboxylase                                    | A0A3R7SN98 | 43.9 | ↓ | 0.5 | 0.4  |
| Isocitrate dehydrogenase                                | A0A3R7M382 | 61.2 | ↓ | 0.6 | 0.4  |
| Aldehyde dehydrogenase family 3 member B1               | A0A3R7MAU3 | 38.7 | ↓ | 0.4 | 0.3  |
| Aldehyde dehydrogenase family 3 member B1 (Fragment)    | A0A3R7Q7A4 | 53.7 | ↓ | 0.4 | 0.3  |
| Betaine aldehyde dehydrogenase                          | A0A1S6KYJ7 | 43   | ↓ | 0.6 | 0.4  |
| Putative sorbitol dehydrogenase-like                    | A0A3R7P7V3 | 32.3 | ↓ | 0.4 | 0.2  |
| Cytochrome c oxidase subunit                            | A0A0A0R7J0 | 83.1 | ↓ | 0.6 | 0.5  |
| Mitochondrial cytochrome c oxidase subunit VIc          | A0A0A0RAJ5 | 73.1 | ↓ | 0.7 | 0.5  |
| Mitochondrial cytochrome c oxidase subunit Va           | M1FZ15     | 49.7 | ↓ | 0.6 | 0.5  |
| Mitochondrial cytochrome c oxidase subunit IV           | K9N1H0     | 28.8 | ↓ | 0.6 | 0.5  |
| H <sup>+</sup> ATPase                                   | A0A3R7MT65 | 9    | ↓ | 0.6 | 0.4  |
| V-ATPase A                                              | A0A3R7MHZ7 | 69.2 | ↓ | 0.5 | 0.4  |

|                                                         |            |      |    |     |      |
|---------------------------------------------------------|------------|------|----|-----|------|
| V-type proton ATPase subunit a                          | F4YYJ1     | 30.4 | ↓  | 0.6 | 0.4  |
| NADH-ubiquinone oxidoreductase 75 kDa subunit,          | A0A3R7PGD1 | 15.2 | ↓  | 0.6 | 0.4  |
| Putative NADPH--cytochrome P450                         | A0A3R7MG60 | 56.2 | ↓  | —   | 0.5  |
| Putative NADH-cytochrome b5 reductase 3-like isoform    | A0A3R7M6V6 | 54.3 | ↓  | 0.5 | 0.4  |
| Putative electron transfer flavoprotein-ubiquinone      | A0A3R7LXE7 | 50.5 | ↓  | 0.6 | 0.4  |
| NADH-ubiquinone oxidoreductase chain 4                  | A6YIK1     | 8.7  | ↓  | 0.4 | 0.4  |
| NADH dehydrogenase                                      | A0A3R7QEY9 | 65.5 | ↓  | 0.6 | 0.5  |
| Putative peroxisomal acyl-coenzyme A oxidase 1          | A0A3R7M436 | 39.4 | ↓  | 0.3 | 0.2  |
| Putative peroxisomal acyl-coenzyme A oxidase 1          | A0A3R7PVZ4 | 32.4 | ↓  | —   | 0.2  |
| Putative long-chain-fatty-acid--CoA ligase 4 isoform X1 | A0A3R7PWQ1 | 56.4 | ↓  | 0.6 | 0.5  |
| Putative long-chain-fatty-acid--CoA ligase 4 isoform X1 | A0A3R7QCE8 | 48.9 | ↓  | 0.5 | 0.4  |
| <b>Hormone metabolism</b>                               |            |      |    |     |      |
| Juvenile hormone epoxide hydrolase 1                    | A0A3R7M6S0 | 44.8 | ↓  | 0.4 | 0.3  |
| JHE-like carboxylesterase 1                             | A0A3R7QL16 | 45.2 | ↓  | 0.3 | 0.2  |
| JHE-like carboxylesterase 1                             | A0A3R7SM29 | 25.1 | ↓  | 0.3 | 0.2  |
| JHE-like carboxylesterase 2                             | A0A3R7Q273 | 25.3 | ↓  | 0.3 | 0.2  |
| JHE-like carboxylesterase 1                             | A0A3R7QJ23 | 34.2 | ↑↓ | 1.6 | 0.5  |
| JHE-like carboxylesterase 1                             | A0A3R7QQ39 | 34.5 | ↓  | 0.5 | 0.3  |
| JHE-like carboxylesterase 1                             | A0A3R7M2P7 | 34.2 | ↓  | 0.6 | 0.2  |
| JHE-like carboxylesterase 1                             | A0A3R7MER8 | 33.8 | ↓  | 0.3 | 0.1  |
| JHE-like carboxylesterase 1                             | A0A3R7Q4U6 | 24.9 | ↑  | 4.3 | 3.7  |
| Ecdysteroid regulated-like protein                      | H2EQK1     | 22.6 | ↑  | 5.0 | 11.5 |
