# Supplementary material for: Down-Regulation of Lipid Metabolism in the Hepatopancreas of Shrimp Litopenaeus vannamei upon Light and Heavy Infection of Enterocytozoon hepatopenaei: A Comparative Proteomic Study
Source: MDPI journal article supplement (doi:10.3390/ijms231911574), 2022-09-30
Supplement: s1 [file s1]

**Table S4 Identified hypothetical secreted proteins of EHP.**

| <b>Protein ID</b> | <b>Protein name</b>                | <b>Gene name</b> | <b>Transmembrane times</b> |
|-------------------|------------------------------------|------------------|----------------------------|
| OQS53364.1        | hypothetical protein<br>EHP00_1967 | EHP00_1967       | 0                          |
| OQS53466.1        | hypothetical protein<br>EHP00_634  | EHP00_634        | 0                          |
| OQS53543.1        | lrrc57                             | EHP00_2050       | 0                          |
| OQS53550.1        | LRRC1                              | EHP00_1920       | 0                          |
| OQS53551.1        | hypothetical protein<br>EHP00_2690 | EHP00_2690       | 0                          |
| OQS53972.1        | hypothetical protein<br>EHP00_1803 | EHP00_1803       | 0                          |
| OQS54038.1        | hypothetical protein<br>EHP00_1702 | EHP00_1702       | 1                          |
| OQS54198.1        | hypothetical protein<br>EHP00_841  | EHP00_841        | 0                          |
| OQS54354.1        | hypothetical protein<br>EHP00_1424 | EHP00_1424       | 0                          |
| OQS54480.1        | hypothetical protein<br>EHP00_1055 | EHP00_1055       | 0                          |
| OQS55031.1        | SWP7                               | EHP00_944        | 0                          |
| OQS55241.1        | hypothetical protein<br>EHP00_613  | EHP00_613        | 0                          |
| OQS55315.1        | hypothetical protein<br>EHP00_777  | EHP00_777        | 1                          |
| OQS55830.1        | Coatomer beta subunit              | EHP00_372        | 0                          |
