# Supplementary material for: Down-Regulation of Lipid Metabolism in the Hepatopancreas of Shrimp Litopenaeus vannamei upon Light and Heavy Infection of Enterocytozoon hepatopenaei: A Comparative Proteomic Study
Source: MDPI journal article supplement (doi:10.3390/ijms231911574), 2022-09-30
Supplement: s1 [file s1]

**Table S3 Identified hypothetical transporters of EHP.**

| Gene ID    | Protein name              | UniProt annotation        | Peptides | Coverage | Transmembran<br>times | Predicted domain                   | signal<br>peptide |
|------------|---------------------------|---------------------------|----------|----------|-----------------------|------------------------------------|-------------------|
| EHP00_690  | hsp70                     | Hsp70                     | 28       | 49.90%   | 0                     | MreB_Mbl                           | no                |
| EHP00_2182 | molecular chaperone       | Molecular chaperone       | 27       | 57.70%   | 0                     | HSP70                              | no                |
| EHP00_809  | HSP90                     | HSP90                     | 25       | 45.50%   | 0                     | HSP90<br>HATPase_c                 | no                |
| EHP00_658  | SPAC1F5.02                | SPAC1F5.02                | 18       | 46.70%   | 0                     | Thioredoxin_6<br>Thioredoxin       | no                |
| EHP00_1750 | asparagine--tRNA          | Asparagine--tRNA          | 17       | 46.50%   | 0                     | tRNA-synt_2                        | no                |
| EHP00_1379 | TIF1                      | TIF1                      | 15       | 42.70%   | 0                     | DEXDc<br>HELICc                    | no                |
| EHP00_440  | aspartate--tRNA           | Aspartate--tRNA<br>ligase | 15       | 32.80%   | 0                     | tRNA_anti-codon<br>tRNA-synt_2     | no                |
| EHP00_1920 | LRRC1                     | LRRC1                     | 14       | 28.70%   | 0                     | LRR                                | 1~25              |
| EHP00_1756 | myosin                    | Myosin                    | 12       | 14%      | 0                     | Efh                                | no                |
| EHP00_1566 | spt16                     | FACT complex<br>subunit   | 12       | 17.80%   | 0                     | FACT-Spt16_Nlob<br>SPT16<br>Rtt106 | no                |
| EHP00_1467 | sec31                     | Sec31                     | 11       | 21.80%   | 0                     | no                                 | no                |
| EHP00_2144 | ADPATP carrier<br>protein | ADPATP carrier<br>protein | 11       | 62.40%   | 0                     | SRPRB                              | no                |
| EHP00_616  | FACE1                     | CAAX prenyl<br>protease   | 11       | 28.60%   | 7                     | Peptidase_M48_N<br>Peptidase_M48   | no                |
| EHP00_447  | UBA1                      | UBA1                      | 10       | 19.10%   | 0                     | ThiF<br>UBA_e1_thiolCys            | no                |

|            |                                      |                                        |    |         |   |                                           |      |
|------------|--------------------------------------|----------------------------------------|----|---------|---|-------------------------------------------|------|
| EHP00_493  | HAT2                                 | HAT2                                   | 10 | 37.60%  | 0 | CAF1C_H4-bd<br>WD40                       | no   |
| EHP00_2001 | LACS3                                | LACS3                                  | 10 | 118.40% | 0 | AMP-binding                               | no   |
| EHP00_52   | importin                             | Importin                               | 10 | 15.40%  | 0 | no                                        | no   |
| EHP00_1378 | lysine--tRNA                         | Lysine--tRNA ligase                    | 10 | 21.60%  | 0 | tRNA_anti-codon<br>tRNA-synt_2<br>Tubulin | no   |
| EHP00_486  | TUB2                                 | Tubulin beta chain                     | 10 | 32.80%  | 0 | Tubulin 51 248 7.69e-<br>62<br>Tubulin_C  | no   |
| EHP00_1249 | GSP1                                 | GSP1                                   | 9  | 43.30%  | 0 | Roc                                       | no   |
| EHP00_1201 | RPT6                                 | 26S proteasome<br>regulatory subunit 8 | 9  | 27.40%  | 0 | AAA                                       | no   |
| EHP00_372  | Coatomer beta<br>subunit             | Coatomer beta<br>subunit               | 8  | 15.10%  | 0 | WD40                                      | 1~23 |
| EHP00_173  | PSMC2                                | PSMC2                                  | 8  | 23.70%  | 0 | AAA                                       | no   |
| EHP00_693  | YRB1                                 | YRB1                                   | 7  | 41.50%  | 0 | RanBD                                     | no   |
| EHP00_820  | Ubi3                                 | Ubi3                                   | 7  | 51%     | 0 | UBQ                                       | no   |
| EHP00_956  | copa                                 | Copa                                   | 7  | 8.40%   | 0 | WD40                                      | no   |
| EHP00_2683 | Long-chain-fatty-<br>acid-CoA ligase | Long-chain-fatty-<br>acid-CoA ligase   | 7  | 28.10%  | 0 | AMP-binding                               | no   |
| EHP00_1656 | SSE1                                 | SSE1                                   | 7  | 12.50%  | 0 | HSP70                                     | no   |
| EHP00_155  | Xpo1                                 | Xpo1                                   | 7  | 9.10%   | 0 | IBN_N<br>Xpo1<br>CRM1_C                   | no   |

|            |                                                     |                                                     |   |        |    |                                 |    |
|------------|-----------------------------------------------------|-----------------------------------------------------|---|--------|----|---------------------------------|----|
| EHP00_2    | 26S                                                 | 26S                                                 | 7 | 27.40% | 0  | AAA                             | no |
| EHP00_145  | RPT5                                                | RPT5                                                | 7 | 28.20% | 0  | AAA                             | no |
| EHP00_537  | UBA domain-<br>containing protein                   | UBA domain-<br>containing protein                   | 6 | 25%    | 0  | no                              | no |
| EHP00_2592 | Peptidyl-prolyl cis-<br>trans isomerase             | Peptidyl-prolyl cis-<br>trans isomerase             | 6 | 76%    | 0  | Pro_isomerase                   | no |
| EHP00_377  | DBP2                                                | DBP2                                                | 6 | 15.40% | 0  | DEXDc<br>HELICc                 | no |
| EHP00_1129 | CHS1                                                | Chitin synthase                                     | 6 | 10.20% | 6  | Glyco_tranf_2_3                 | no |
| EHP00_1481 | SAR1                                                | Small COPII coat<br>GTPase SAR1                     | 6 | 36.80% | 0  | SAR                             | no |
| EHP00_897  | SEC63                                               | SEC63                                               | 5 | 12.50% | 3  | DnaJ                            | no |
| EHP00_2333 | protein transport<br>protein sec61 alpha<br>subunit | Protein transport<br>protein sec61 alpha<br>subunit | 5 | 10.80% | 10 | Plug_translocon<br>SecY         | no |
| EHP00_673  | sec18                                               | Vesicular-fusion<br>protein SEC18                   | 5 | 9.90%  | 0  | AAA                             | no |
| EHP00_1881 | drg1                                                | Drg1                                                | 5 | 18.20% | 0  | MMR_HSR1<br>MMR_HSR1_Xtn<br>TGS | no |
| EHP00_454  | hypothetical<br>protein EHP00_454                   | EF-hand domain-<br>containing protein               | 5 | 10.80% | 6  | MS_channel                      | no |
| EHP00_624  | hypothetical protein<br>EHP00_624                   | MFS_1_like domain-<br>containing protein            | 5 | 13.50% | 12 | MFS_1_like                      | no |
| EHP00_1522 | hypothetical protein<br>EHP00_1522                  | Uncharacterized<br>protein                          | 5 | 12.60% | 12 | MFS_1                           | no |
| EHP00_136  | ISW2                                                | ISW2                                                | 5 | 7.20%  | 0  | DEXDc<br>HELICc                 | no |
| EHP00_249  | Ppp1r7                                              | Ppp1r7                                              | 4 | 22.40% | 0  | no                              | no |

|            |                                                  |                                                  |   |        |   |                            |      |
|------------|--------------------------------------------------|--------------------------------------------------|---|--------|---|----------------------------|------|
| EHP00_757  | PkpA                                             | PkpA                                             | 4 | 9.20%  | 0 | Pkinase_Tyr                | no   |
| EHP00_961  | CDC48                                            | CDC48                                            | 4 | 7.70%  | 0 | AAA<br>Vps4_C              | no   |
| EHP00_762  | cshE                                             | CshE                                             | 4 | 9%     | 0 | DEXDc<br>HELICc            | no   |
| EHP00_949  | FAL1                                             | FAL1                                             | 4 | 12.60% | 0 | DEXDc<br>HELICc            | no   |
| EHP00_2660 | hypothetical protein<br>EHP00_2660               | Nucleoporin_N<br>domain-containing<br>protein    | 4 | 7.60%  | 0 | Nucleoporin_N              | no   |
| EHP00_382  | OLA1                                             | OLA1                                             | 4 | 10%    | 0 | MMR_HSR1<br>YchF-GTPase_C  | no   |
| EHP00_31   | Rhoa                                             | Rhoa                                             | 4 | 24.50% | 0 | RHO                        | no   |
| EHP00_2239 | Superfamily II<br>DNARNA helicase<br>sNF2 family | Superfamily II<br>DNARNA helicase<br>sNF2 family | 3 | 14.10% | 6 | RING                       | no   |
| EHP00_2050 | Lrrc57                                           | Lrrc57                                           | 3 | 17.40% | 0 | LRR<br>LRR_TYP             | 1~25 |
| EHP00_534  | PSMC6                                            | PSMC6                                            | 3 | 11.40% | 0 | AAA                        | no   |
| EHP00_2239 | superfamily II<br>DNARNA helicase<br>sNF2 family | Superfamily II<br>DNARNA helicase<br>sNF2 family | 3 | 14.10% | 6 | RING                       | no   |
| EHP00_498  | NPL4                                             | Nuclear protein<br>localization protein 4        | 3 | 8%     | 0 | zf-NPL4<br>NPL4<br>ZnF_RBZ | no   |
| EHP00_1531 | hypothetical protein<br>EHP00_1531               | ABC transporter<br>domain-containing<br>protein  | 3 | 6%     | 6 | AAA<br>ABC2_membrane       | no   |
| EHP00_396  | fes-4                                            | Fes-4                                            | 3 | 8.10%  | 6 | AAA                        | no   |

|            |                                                    |                                                    |   |        |   |                                      |    |
|------------|----------------------------------------------------|----------------------------------------------------|---|--------|---|--------------------------------------|----|
| EHP00_888  | IMPA1                                              | Importin subunit<br>alpha                          | 3 | 8.30%  | 0 | ARM                                  | no |
| EHP00_1823 | hypothetical protein<br>EHP00_1823                 | Uncharacterized<br>protein                         | 3 | 13.80% | 0 | WD40                                 | no |
| EHP00_1060 | CYP19-3                                            | Peptidyl-prolyl cis-<br>trans isomerase            | 3 | 21.40% | 0 | Pro_isomerase                        | no |
| EHP00_2429 | signal recognition<br>particle subunit<br>FFHSRP54 | Signal recognition<br>particle subunit<br>FFHSRP54 | 3 | 11.10% | 0 | SRP54_N<br>SRP54<br>SRP_SPB          | no |
| EHP00_322  | AGD5                                               | AGD5                                               | 3 | 17.40% | 0 | ArfGap                               | no |
| EHP00_284  | hypothetical protein<br>EHP00_284                  | Uncharacterized<br>protein                         | 3 | 13.60% | 0 | SRP_TPR_like                         | no |
| EHP00_1445 | hypothetical protein<br>EHP00_1445                 | Uncharacterized<br>protein                         | 3 | 16.70% | 0 | Porin_3                              | no |
| EHP00_591  | Chd6                                               | Chd6                                               | 3 | 3.30%  | 0 | DEXDc<br>HELICc<br>AT_hook<br>CHROMO | no |
| EHP00_1769 | hypothetical protein<br>EHP00_1769                 | Uncharacterized<br>protein                         | 3 | 19.50% | 0 | no                                   | no |
| EHP00_206  | Ptpn3                                              | Ptpn3                                              | 2 | 11.60% | 0 | PTPc                                 | no |
| EHP00_1108 | UBC7                                               | UBC7                                               | 2 | 14.40% | 0 | UBCc                                 | no |
| EHP00_444  | cyp2                                               | Cyp2                                               | 2 | 45.30% | 0 | Pro_isomerase                        | no |
| EHP00_1251 | Pim1                                               | Pim1                                               | 2 | 5.80%  | 0 | RCC1<br>RCC1_2                       | no |
| EHP00_500  | PRKCH                                              | PRKCH                                              | 2 | 3.60%  | 0 | C1<br>S_TKc                          | no |
| EHP00_1133 | Sid1                                               | Sid1                                               | 2 | 5.60%  | 2 | Pkinase_Tyr                          | no |

|            |                                                        |                                                                |   |        |    |                        |      |
|------------|--------------------------------------------------------|----------------------------------------------------------------|---|--------|----|------------------------|------|
| EHP00_1134 | SvkA                                                   | SvkA                                                           | 2 | 6.60%  | 0  | Pkinase_Tyr            | no   |
| EHP00_195  | cytidylate                                             | (d)CMP kinase                                                  | 2 | 10.60% | 0  | Cytidylate_kin         | no   |
| EHP00_1771 | ABCE2                                                  | ABCE2                                                          | 2 | 5.30%  | 6  | RLI<br>Fer4<br>AAA     | no   |
| EHP00_490  | pigw                                                   | GPI-anchored wall<br>transfer protein 1                        | 2 | 7.80%  | 13 | GWT1                   | no   |
| EHP00_1145 | RPL21                                                  | RPL21                                                          | 2 | 11.30% | 0  | Ribosomal_L21e         | no   |
| EHP00_1252 | AGD15                                                  | AGD15                                                          | 2 | 8.60%  | 0  | ArfGap                 | no   |
| EHP00_11   | eif3i                                                  | Eif3i                                                          | 2 | 8.70%  | 0  | WD40                   | no   |
| EHP00_303  | prp22                                                  | Prp22                                                          | 2 | 3.20%  | 0  | DEXDc<br>HELICc<br>HA2 | no   |
| EHP00_42   | PMT6                                                   | Dolichyl-phosphate-<br>mannose--protein<br>mannosyltransferase | 1 | 2.60%  | 2  | PMT<br>PMT_4TMC<br>MIR | 1~25 |
| EHP00_1265 | Dolichol-phosphate<br>mannosyltransferase<br>subunit 1 | Dolichol-phosphate<br>mannosyltransferase<br>subunit 1         | 1 | 6.70%  | 0  | Glycos_transf_2        | no   |
| EHP00_1668 | HRD1                                                   | HRD1                                                           | 1 | 3.80%  | 6  | RING                   | no   |
| EHP00_1095 | Abcb6                                                  | Abcb6                                                          | 1 | 11.90% | 6  | AAA                    | no   |
| EHP00_1876 | ATPase AAA                                             | ATPase AAA                                                     | 1 | 2.90%  | 0  | AAA                    | no   |
| EHP00_132  | Zdhhc16                                                | Palmitoyltransferase                                           | 1 | 5.90%  | 3  | DHHC                   | 1~21 |

|            |                                                                      |                                                                      |   |       |    |                |    |                                            |
|------------|----------------------------------------------------------------------|----------------------------------------------------------------------|---|-------|----|----------------|----|--------------------------------------------|
| EHP00_2105 | glucose transporter<br>type 1                                        | Glucose transporter<br>type 1                                        | 1 | 2.30% | 12 | Sugar_tr       | no | Predicted<br>only by<br>gene<br>annotation |
| EHP00_1308 | Endochitinase                                                        | Endochitinase                                                        | 1 | 2.90% | 0  | Glyco_hydro_19 | no |                                            |
| EHP00_717  | RASD2                                                                | RASD2                                                                | 1 | 7.40% | 0  | Roc            | no |                                            |
| EHP00_2135 | transmembrane<br>amino acid<br>transporter                           | Transmembrane<br>amino acid transporter                              | 1 | 2.8   | 11 | Aa_trans       | no |                                            |
| EHP00_2262 | ABC-type polar<br>amino acid transport<br>system ATPase<br>component | ABC-type polar<br>amino acid transport<br>system ATPase<br>component | 1 | 2.40% | 6  | no             | no |                                            |
| EHP00_2098 | ATP-ADP carrier<br>protein                                           | ADP,ATP carrier<br>protein                                           | 4 | 9.20% | 12 | TLC            | no |                                            |
| EHP00_2101 | ADP-ATP carrier<br>protein 4                                         | ADP,ATP carrier<br>protein                                           | 3 | 7%    | 12 | TLC            | no |                                            |
