# Supplementary material for: Down-Regulation of Lipid Metabolism in the Hepatopancreas of Shrimp Litopenaeus vannamei upon Light and Heavy Infection of Enterocytozoon hepatopenaei: A Comparative Proteomic Study
Source: MDPI journal article supplement (doi:10.3390/ijms231911574), 2022-09-30
Supplement: s1 [file s1]

**Table S2 Primers information.**

| <b>Primers</b>                   | <b>Sequence (5'- 3')</b> |
|----------------------------------|--------------------------|
| <i>LDH-F</i>                     | CCAGATTCCGCTTCCAC        |
| <i>LDH-R</i>                     | AGTCACGCAGACGCACA        |
| <i>PDHE1<math>\beta</math>-F</i> | ATGACTGTTCGTGATGCC       |
| <i>PDHE1<math>\beta</math>-R</i> | CTTCTTCCACAATCCTCG       |
| <i>PC-F</i>                      | CTGGGATTGACTTGGA         |
| <i>PC-R</i>                      | GTATCTGGGCGGAAACT        |
| <i>ACACA-F</i>                   | CATCAAGTTGGCGGACAC       |
| <i>ACACA-R</i>                   | ACGCAATGCCGTTTCTAT       |
| <i>Lip1-F</i>                    | GCTGGCTTACAAACTCGC       |
| <i>Lip1-R</i>                    | AATCAATGCTCGCAGGAA       |
| <i>CPT1-F</i>                    | AACGAAGGGAATGGGCTA       |
| <i>CPT1-R</i>                    | TCTACGATGCTCGCTGGT       |
| <i>SCD-F</i>                     | CCTTCGCAACCTGGACTG       |
| <i>SCD-R</i>                     | CGCCCACTCGTAGATGC        |
| <i>JHE1-F</i>                    | TCCGAAAGAGCAAGGTTA       |
| <i>JHE1-R</i>                    | GAGGCGATACTGGATGAC       |
| <i>EcdR-F</i>                    | TTCCAGGATTGCGGCTCG       |
| <i>EcdR-R</i>                    | GCTGTAAGGGCACGGGTT       |
| <i>PSaT-F</i>                    | TGCTGTATGGCGTTATCG       |
| <i>PSaT-R</i>                    | ATTCGCACAAGCGTCTGA       |
| <i>SSDHm-F</i>                   | AAGGTCCAGGCTCTCTCC       |
| <i>SSDHm-R</i>                   | ACCACGCATACAGCAACA       |
| <i>SPN-F</i>                     | TGTTGCTGCTGTTCCGGGG      |
| <i>SPN-R</i>                     | ACTTTGCTGGGCATCACC       |
| <i>PPO2-F</i>                    | TCTGCGGAATGACTTTGG       |
| <i>PPO2-R</i>                    | TGAACCCCTGGTGAATGG       |
| <i>Lectin-F</i>                  | GTGCTCCTGCTGTCCTTC       |
| <i>Lectin-R</i>                  | GCGGTCGTAAATGTTGTG       |
| <i>Tuba1-F</i>                   | TTCAACACCTTCTTCAGC       |
| <i>Tuba1-R</i>                   | TTAGCAGCATCCTCCTTA       |
| <i>EHPtp2-192F</i>               | AATGGCTCAAGGGTTCA        |
| <i>EHPtp2-192R</i>               | CTCCTGCCCTGTTTACG        |
