# Supplementary material for: Down-Regulation of Lipid Metabolism in the Hepatopancreas of Shrimp Litopenaeus vannamei upon Light and Heavy Infection of Enterocytozoon hepatopenaei: A Comparative Proteomic Study
Source: Int J Mol Sci. 2022 Sep 30;23(19):11574. doi: 10.3390/ijms231911574 (PMC9570011; doi:10.3390/ijms231911574)
Supplement: Supplementary file 1 [file ijms-23-11574-s001.zip]

Archive with 4 entries (4 files):
- Table S3-Identified hypothetical transporters of EHP.pdf
- Table S4-Identified hypothetical secreted proteins of EHP.pdf
- Table S1-Representative proteins of challenged hepatopancreas response to EHP infection.pdf
- Table S2-Primers information.pdf
